# Supplementary material for: Diffuse Optical Monitoring of Cerebral Hemodynamics and Oxygen Metabolism during and after Cardiopulmonary Bypass: Hematocrit Correction and Neurological Vulnerability
Source: MDPI journal article supplement (doi:10.3390/metabo13111153), 2023-11-16
Supplement: s1 [file s1]

## Article

# Diffuse Optical Monitoring of Cerebral Hemodynamics and Oxygen Metabolism During and After Cardiopulmonary Bypass: Hematocrit Correction and Neurological Vulnerability

## Supplementary Materials

### S1. Derivation of Hematocrit Corrected CBF

In prior work, Boas et. al. [S1] derived the following theoretical relation between CBF and the DCS BFI based on shear-induced diffuse motion of red blood cells [S2]:

$$CBF = \frac{3 R \mu'_{s,avg}}{8 \alpha_{shear} \mu'_{s,blood}} \times BFI. \quad (S1)$$

As defined in the main text,  $\mu'_{s,avg}$  is the reduced scattering coefficient of tissue at the DCS light wavelength,  $R$  is the average radius of the blood vessels sampled by DCS,  $\alpha_{shear}$  is the proportionality between the shear flow rate and the red blood cell diffusion coefficient (empirically observed to be in the range of  $10^{-7}$  -  $10^{-6}$  mm<sup>2</sup> [S2, S3]), and  $\mu'_{s,blood}$  is the reduced scattering coefficient of blood. Note that  $\mu'_{s,blood} = \mu_{s,blood}(1 - g)$ , where  $\mu_{s,blood}$  is the scattering coefficient of blood and  $g$  is the scattering anisotropy coefficient of the scatterer within blood (i.e., the red blood cell). Note also that  $\mu_{s,blood}$  is the product of the number density of red blood cells with the light scattering cross-section of a red blood cell, i.e.,  $\mu_{s,blood} = \rho_{RBC} \times \sigma_{RBC}$ . The number density of red blood cells in blood can be written in terms of the hematocrit ( $Hct$ ):  $\rho_{RBC} = Hct/vol_{RBC}$ , where  $vol_{RBC}$  is the volume of a red blood cell. Thus, the reduced scattering coefficient for blood is

$$\mu'_{s,blood} = \frac{Hct}{vol_{RBC}} \times \sigma_{RBC}(1 - g). \quad (S2)$$

Substituting Equation (S2) into Equation (S1), we obtain

$$CBF \approx \frac{3 vol_{RBC} \times \mu'_{s,avg} \times R}{8 \alpha_{shear} \times Hct \times \sigma_{RBC} \times (1 - g)} \times BFI. \quad (S3)$$

### S2. Impact of Accounting for PaO<sub>2</sub>, Hct and $\mu'_{s,avg}$ in the calculation of CaO<sub>2</sub>, OEF, CBF and CMRO<sub>2</sub>

The hematocrit ( $Hct$ ) correction of *in vivo* DCS BFI data, as described above, results in CBF scaling inversely proportionally with  $Hct$  and proportionally with  $\mu'_{s,avg}$ . In the following scenarios we examine the individual errors in CBF and CMRO<sub>2</sub> quantification associated with neglecting  $\mu'_{s,avg}$  or  $Hct$  individually (Scenario 1 or Scenario 2, respectively), and together (Scenario 3). Additionally, we examine the incremental error associated with neglecting the contribution of PaO<sub>2</sub> (i.e., free dissolved arterial oxygen) in the calculation of CaO<sub>2</sub> and OEF (Scenario 4). Finally, we explore common scenarios where invasive arterial blood gas sampling to quantify  $Hct$  and PaO<sub>2</sub> is only available at baseline (Scenario 5), or not available at all (Scenario 6). The error associated with each scenario is calculated relative to the quantitative values achieved when PaO<sub>2</sub>,  $Hct$ , and  $\mu'_{s,avg}$  are accounted for in the calculation of mean CaO<sub>2</sub>, OEF, CBF and CMRO<sub>2</sub> during baseline and during mild hypothermic CPB (Reference Scenario). Each scenario is explicitly defined as follows, and results summarized in **Table S1**:

- **Reference Scenario.** Repeated arterial blood gas sampling, CBF corrected for  $Hct$  and  $\mu'_{s,avg}$ , OEF and CaO<sub>2</sub> corrected for  $Hct$  and PaO<sub>2</sub>. CBF correction for  $Hct$  and  $\mu'_{s,avg}$  performed using Equation (8). CaO<sub>2</sub> correction for PaO<sub>2</sub> and  $Hct$  performed using Equation (4). CaO<sub>2</sub> correction for PaO<sub>2</sub> and  $Hct$  also impacts the calculation of OEF per Equation (5). OEF is further impacted by  $Hct$  correction via its dependency on CvO<sub>2</sub> which incorporates  $Hct$  per Equation (6).
- **Scenario 1.** CBF neglects  $\mu'_{s,avg}$ : CBF corrected for  $Hct$ , but not  $\mu'_{s,avg}$ .
- **Scenario 2.** CBF neglects  $Hct$ : CBF corrected for  $\mu'_{s,avg}$ , but not  $Hct$ .
- **Scenario 3.** Uncorrected CBF: CBF not corrected for  $\mu'_{s,avg}$  and  $Hct$ .
- **Scenario 4.** Uncorrected CBF; neglect PaO<sub>2</sub>: CBF not corrected for  $\mu'_{s,avg}$  and  $Hct$ . OEF and CaO<sub>2</sub> only corrected for  $Hct$ , not PaO<sub>2</sub>. This scenario may occur when there is only venous vascular access to a patient and changes in  $Hct$  may be corrected for based on repeated venous blood gas sampling.

- **Scenario 5. Baseline blood gas only; uncorrected CBF:** Arterial blood gas sampling at baseline only. Thus, only baseline OEF and CaO<sub>2</sub> corrected for *Hct* and PaO<sub>2</sub>. PaO<sub>2</sub>, *Hct*, and CaO<sub>2</sub> assumed to remain constant from baseline. CBF not corrected for  $\mu'_{s,avg}$  and *Hct*.
- **Scenario 6. Standard Analysis - No blood gas or hematocrit information; uncorrected CBF:** No CaO<sub>2</sub> calculation. No OEF correction for *Hct* and PaO<sub>2</sub>. *Hct*, and CaO<sub>2</sub> assumed to remain constant from baseline. CBF not corrected for  $\mu'_{s,avg}$  and *Hct*. In this scenario, it is possible to estimate OEF as:

$$OEF = \frac{SaO_2 - StO_2}{\gamma SaO_2}, \quad (S4)$$

where  $\gamma$  is the fixed venous fraction also used in the estimation of *SvO<sub>2</sub>* in Equation (7). This scenario represents the conventional approach commonly used in clinical diffuse optical measurements of CMRO<sub>2</sub>.

**Table S1.** Error in CMRO<sub>2</sub> Parameters Associated with Correction for PaO<sub>2</sub>, *Hct* and  $\mu'_{s,avg}$

| Scenario                                                            | Baseline                                       |                        | Mild Hypothermic CPB                            |                        |                                 |                               |                               |                                |
|---------------------------------------------------------------------|------------------------------------------------|------------------------|-------------------------------------------------|------------------------|---------------------------------|-------------------------------|-------------------------------|--------------------------------|
|                                                                     | CaO <sub>2</sub>                               | OEF                    | CaO <sub>2</sub>                                | OEF                    | rCaO <sub>2</sub>               | rOEF                          | rCBF                          | rCMRO <sub>2</sub>             |
| Reference<br>(n=26)                                                 | 10                                             | 62                     | 16                                              | 55                     | 165                             | 88                            | 64                            | 91                             |
|                                                                     | [9, 12]<br>(mL<br>O <sub>2</sub> /dL<br>blood) | [56, 66]<br>(%)        | [15, 16]<br>(mL<br>O <sub>2</sub> /dL<br>blood) | [49, 58]<br>(%)        | [132, 180]<br>(% Base-<br>line) | [83, 98]<br>(% Base-<br>line) | [45, 90]<br>(% Base-<br>line) | [57, 135]<br>(% Base-<br>line) |
| % Error, Median [IQR]                                               |                                                |                        |                                                 |                        |                                 |                               |                               |                                |
| 1. CBF neglects $\mu'_{s,avg}$                                      | 0.0 %<br>[0.0, 0.0]                            | 0.0 %<br>[0.0, 0.0]    | 0.0 %<br>[0.0, 0.0]                             | 0.0 %<br>[0.0, 0.0]    | 0.0 %<br>[0.0, 0.0]             | 0.0 %<br>[0.0, 0.0]           | +1.4 %<br>[-3.7, 5.1]         | +1.4 %<br>[-3.7, 5.1]          |
| 2. CBF neglects <i>Hct</i>                                          | 0.0 %<br>[0.0, 0.0]                            | 0.0 %<br>[0.0, 0.0]    | 0.0 %<br>[0.0, 0.0]                             | 0.0 %<br>[0.0, 0.0]    | 0.0 %<br>[0.0, 0.0]             | 0.0 %<br>[0.0, 0.0]           | +58 %<br>[26, 72]             | +58 %<br>[26, 72]              |
| 3. Uncorrected CBF                                                  | 0.0 %<br>[0.0, 0.0]                            | 0.0 %<br>[0.0, 0.0]    | 0.0 %<br>[0.0, 0.0]                             | 0.0 %<br>[0.0, 0.0]    | 0.0 %<br>[0.0, 0.0]             | 0.0 %<br>[0.0, 0.0]           | +57 %<br>[31, 79]             | +57 %<br>[31, 79]              |
| 4. Uncorrected CBF<br>+ Neglect PaO <sub>2</sub>                    | -2.8 %<br>[-3.0, -2.3]                         | -1.7 %<br>[-2.1, -1.3] | -4.9 %<br>[-5.2, -4.6]                          | -4.2 %<br>[-5.0, -3.6] | -2.2 %<br>[-2.7, -1.6]          | -2.4 %<br>[-3.1, -1.8]        | +57 %<br>[31, 79]             | +50 %<br>[27, 72]              |
| 5. Baseline Blood Gas<br>Only                                       | 0.0 %<br>[0.0, 0.0]                            | 0.0 %<br>[0.0, 0.0]    | -39 %<br>[-44, -24]                             | -5.4 %<br>[-6.7, -4.6] | -39 %<br>[-44, -24]             | -5.4 %<br>[-6.7, -4.6]        | +57 %<br>[31, 79]             | -9.6 %<br>[-14, -4.9]          |
| 6. Standard Analysis –<br>No PaO <sub>2</sub> or <i>Hct</i>         | -                                              | -1.7 %<br>[-2.1, -1.3] | -                                               | -8.0 %<br>[-9.4, -6.8] | -39 %<br>[-44, -24]             | -6.4 %<br>[-8.0, -4.9]        | +57 %<br>[31, 79]             | -10 %<br>[-15, -5.2]           |
| $\Delta\%$ Error, Median [IQR]                                      |                                                |                        |                                                 |                        |                                 |                               |                               |                                |
| Scenario 4 vs. 3<br>CaO <sub>2</sub> , OEF neglect PaO <sub>2</sub> | -2.8 %<br>[-3.0, -2.3]                         | -1.7 %<br>[-2.1, -1.3] | -4.9 %<br>[-5.2, -4.6]                          | -4.2 %<br>[-5.0, -3.6] | -2.2 %<br>[-2.7, -1.6]          | -2.4 %<br>[-3.1, -1.8]        | 0.0 %<br>[0.0, 0.0]           | -6.7 %<br>[-8.5, -4.9]         |
| Scenario 6 vs. 4<br>CaO <sub>2</sub> , OEF neglect <i>Hct</i>       | -                                              | 0.0 %<br>[0.0, 0.0]    | -                                               | -3.5 %<br>[-4.6, -2.7] | -37 %<br>[-44, -22]             | -3.6 %<br>[-4.7, -2.8]        | 0.0 %<br>[0.0, 0.0]           | -57 %<br>[-76, -32]            |
| Scenario 6 vs. 5<br>+ Baseline <i>Hct</i> , PaO <sub>2</sub>        | -                                              | -1.7 %<br>[1.3, 2.1]   | -                                               | -2.3 %<br>[2.1, 3.0]   | -0.0 %<br>[0.0, 0.0]            | -0.8 %<br>[0.4, 1.1]          | 0.0 %<br>[0.0, 0.0]           | -0.9 %<br>[0.3, 1.2]           |

Error analysis of Scenario 2 versus Scenario 1 demonstrates the greater impact of neglecting *Hct* versus  $\mu'_{s,avg}$  (+58 [26, 72] % vs. +1.4 [-3.7, 5.1] % error) on calculation of rCBF during mild hypothermia CPB; this error propagates into comparable errors in rCMRO<sub>2</sub>. As a result, the error associated with neglecting both *Hct* and  $\mu'_{s,avg}$  (i.e., uncorrected

CBF; Scenario 3) only modestly differs versus CBF correction neglecting *Hct* (Scenario 2) (+57 [31, 79] % vs. +58 [26, 72] % error).

Neglecting the contribution of  $PaO_2$  (Scenario 4 versus Scenario 3), results in errors in  $CaO_2$  and OEF at baseline and during mild hypothermic CPB. While the magnitude of errors at baseline (i.e., normative oxygen levels,  $PaO_2 = 91$  [84, 96] mmHg) are reasonably small (<3%), error magnitude increases during hyperoxic CPB conditions ( $PaO_2 = 257$  [237, 271] mmHg) for both  $CaO_2$  (-4.9 [-5.2, -4.6] % vs. -2.8 [-3.0, -2.3] % error) and for OEF (-4.2 [-5.0, -3.6] % vs. -1.7 [-2.1, -1.3] % error). The combination of errors in OEF and  $CaO_2$  propagates into a -6.7 [-8.5, -4.9] % effect on  $rCMRO_2$  during CPB attributed to neglecting  $PaO_2$ .

The comparison of Scenario 6 versus Scenario 4 provides insights into the added effect of neglecting changes in *Hct* (as well as changes in  $PaO_2$  already incorporated in Scenario 4) on  $CaO_2$ , OEF, and  $rCMRO_2$  quantification when no blood gas information is available. The impact of neglecting *Hct* on OEF quantification during CPB (-8.0 [-9.4, -6.8] % vs. -4.2 [-5.0, -3.6] % error) is smaller than the impact on  $CaO_2$  estimation. The assumption of constant  $CaO_2$  (i.e.,  $rCaO_2 = 1$ ) during CPB results in a -39 [-44, -24] % error from the reference  $rCaO_2$  value; this is a -37 [-44, -22] % change in error from Scenario 4 due to neglect of *Hct* in Scenario 6. Together this results in a combined median impact of -57 [-76, -32] % error on  $rCMRO_2$  quantification. Note, this is comparable to the error in CBF associated with neglecting *Hct*. However, the negative errors in OEF and  $CaO_2$  offset the positive error from the use of uncorrected  $rCBF$  resulting in a reduction in the magnitude of  $rCMRO_2$  error (+50 [27, 72] % error reduced to -10 [-15, -5.2] % error).

This compensatory effect on  $CMRO_2$  error is apparent when examining *Hct* in the combined multiplicative expression for  $CMRO_2$  (Equation (2), duplicated as Equation (S5) below). In this expression,  $CaO_2$ , which (when ignoring the additive contribution of  $PaO_2$ ) scales proportionally with *Hct*, is multiplied by CBF, which scales inversely proportional to *Hct*. As a result, the *Hct* correction for each term cancels. This reduction follows from:

$$CMRO_2 = CaO_2 \times OEF \times CBF = CaO_2 \times \left( \frac{CaO_2 - CvO_2}{CaO_2} \right) \times CBF = (CaO_2 - CvO_2) \times CBF. \quad (S5)$$

Substituting in Equation (4) for  $CaO_2$ , Equation (6) for  $CvO_2$ , and Equation (8) for CBF, and substituting *A*, *B*, and *C* for assumed scalar constants defined as:

$$A = \left( 1.39 \frac{mL O_2}{g Hgb} \right) \times \left( 32.2 \frac{g Hgb}{dL blood} \right), \quad (S6)$$

$$B = 0.003 \left( \frac{mL O_2}{dL blood \times mmHg} \right), \quad (S7)$$

$$C = \frac{3 vol_{RBC} \times R}{8 \alpha_{shear} \times \sigma_{RBC} \times (1 - g)}, \quad (S8)$$

we arrive at:

$$CMRO_2 = \left( A \times (SaO_2 - SvO_2) + B \times \frac{PaO_2}{Hct} \right) \times \mu'_{s,avg} \times BFI \times C. \quad (S9)$$

Substituting in Equation (7) for  $SvO_2$ , results in an expression for  $CMRO_2$  based on optical measurements  $StO_2$ ,  $\mu'_{s,avg}$ , and BFI, and blood gas measurements  $SaO_2$ ,  $PaO_2$ , and *Hct*:

$$CMRO_2 = \left( A \times \frac{SaO_2 - StO_2}{\gamma} + B \times \frac{PaO_2}{Hct} \right) \times \mu'_{s,avg} \times BFI \times C. \quad (S10)$$

Thus, even without knowledge of *Hct* or  $PaO_2$  from blood gas, by using non-invasive pulse oximetry to estimate  $SaO_2$  from  $SpO_2$ , it is possible to estimate  $CMRO_2$  with marginal error; this error is attributed to the  $PaO_2/Hct$  term and its magnitude relative to the  $(SaO_2 - SvO_2)$  term. Replacing the additive terms with the variables *S* and *E*, where:

$$S = A \times \frac{SaO_2 - StO_2}{\gamma}, \quad E = B \times \frac{PaO_2}{Hct}, \quad (S11)$$

then the fractional error in  $CMRO_2$  may be expressed as:

$$f_{error} = \frac{CMRO_{2,uncorrected} - CMRO_2}{CMRO_2} = \frac{S - (S + E)}{S + E} = -\frac{E}{S + E}. \quad (S12)$$

Because both  $S$  and  $E$  are necessarily positive, the fractional error will always be negative (i.e.,  $|f_{error}| = -f_{error}$ ). The error increases in magnitude with increasing  $PaO_2$ , decreasing  $Hct$ , decreasing  $SaO_2$ , or increasing  $SvO_2$ . In situations where  $PaO_2$  and  $SaO_2$  remain normoxic ( $PaO_2$  between 80–100 mmHg), hematocrit is within our baseline interquartile range of 20–27%, and the difference ( $SaO_2 - SvO_2$ ) ranges between 54–65% (approximated from baseline OEF and  $SaO_2$ ), then the fractional error of  $CMRO_2$  ranges between 3–6%.

Examining the expression for relative  $CMRO_2$  ( $rCMRO_2$ ) compared to baseline values (denoted by a subscripted zero) the expression increases in complexity:

$$rCMRO_2 = \frac{CMRO_2}{CMRO_{2,0}} = \frac{\frac{A}{\gamma} \times (SaO_2 - StO_2) + B \times \frac{PaO_2}{Hct}}{\frac{A}{\gamma} \times (SaO_{2,0} - StO_{2,0}) + B \times \frac{PaO_{2,0}}{Hct_0}} \times \frac{\mu'_{s,avg}}{\mu'_{s,avg,0}} \times \frac{BFI}{BFI_0} = \frac{S + E}{S_0 + E_0} \times \frac{\mu'_{s,avg}}{\mu'_{s,avg,0}} \times \frac{BFI}{BFI_0}. \quad (S13)$$

The fractional error of  $rCMRO_2$  estimation which neglects the  $PaO_2/Hct$  terms (i.e.,  $E$  and  $E_0$ , as defined above) follows as:

$$\frac{rCMRO_{2,uncorrected} - rCMRO_2}{rCMRO_2} = \frac{\frac{S}{S_0} - \frac{S + E}{S_0 + E_0}}{\frac{S + E}{S_0 + E_0}} = \frac{\frac{S}{S + E}}{\frac{S_0}{S_0 + E_0}} - 1 = \frac{1 + f_{error}}{1 + f_{error,0}} - 1 = \frac{f_{error} - f_{error,0}}{1 + f_{error,0}}. \quad (S14)$$

Given the small  $CMRO_2$  errors anticipated under normoxic baseline conditions shown above, (i.e.,  $f_{error,0} \ll 1$ ), then  $1 + f_{error,0} \approx 1$  and the expression simplifies to:

$$\frac{rCMRO_{2,uncorrected} - rCMRO_2}{rCMRO_2} \approx f_{error} - f_{error,0} = |f_{error,0}| - |f_{error}|. \quad (S15)$$

If there is no baseline  $CMRO_2$  error (i.e.,  $f_{error,0} = 0$ ), then  $rCMRO_2$  error is equivalent to  $CMRO_2$  error (i.e.,  $f_{error}$ ). If baseline  $CMRO_2$  error is greater than CPB  $CMRO_2$  error (i.e.,  $|f_{error,0}| > |f_{error}|$ ), then  $rCMRO_2$  error will be positive and result in an overestimation. However, if the reverse is true, i.e., error increases during CPB (as is the case in our analysis), then  $rCMRO_2$  will be underestimated. Altogether, without  $Hct$  or  $PaO_2$  information, we were able to estimate  $rCMRO_2$  with -10 [-15, -5.2] % error during hyperoxic, mild hypothermic CPB.

Comparison of Scenario 5 versus Scenario 6 evaluates the utility of acquiring a single baseline blood gas and using knowledge of baseline  $PaO_2$  and  $Hct$  to improve quantification error. This knowledge provides a small reduction in OEF error (-2.3 [2.1, 3.0] %), however the median impact on  $rCMRO_2$  quantification is < 1%. Thus, the relative utility of a single blood gas timepoint is small.

Altogether, the analysis of the individual contributions of  $PaO_2$ ,  $Hct$ , and  $\mu'_{s,avg}$  demonstrate the predominant role of  $Hct$  correction of both CBF and  $CaO_2$  to achieve best physiologic accuracy. Correction for free dissolved oxygen contributions associated with  $PaO_2$  also resulted in significant, but relatively smaller, reductions in quantification error. Correction for  $\mu'_{s,avg}$  was the least impactful correction. These results strongly support the use of repeated blood gas analysis in patient populations where large fluctuations in  $Hct$  or  $PaO_2$  occur to improve diffuse optical quantification of CBF and  $CMRO_2$ .

### S3. References

- S1. Boas, D.A.; Sakadžić, S.; Selb, J.; Farzam, P.; Franceschini, M.A.; Carp, S.A. Establishing the diffuse correlation spectroscopy signal relationship with blood flow. *Neurophotonics* **2016**, *3*, 031412. <https://doi.org/10.1117/1.nph.3.3.031412>.
- S2. Goldsmith, H.L.; Marlow, J.C. Flow behavior of erythrocytes. II. Particle motions in concentrated suspensions of ghost cells. *J. Colloid Interface Sci.* **1979**, *71*, 383–407. [https://doi.org/10.1016/0021-9797\(79\)90248-0](https://doi.org/10.1016/0021-9797(79)90248-0).
- S3. Tang, J.; Erdener, S.E.; Li, B.; Fu, B.; Sakadžić, S.; Carp, S.A.; Lee, J.; Boas, D.A. Shear-induced diffusion of red blood cells measured with dynamic light scattering-optical coherence tomography. *J. Biophotonics* **2018**, *11*, e201700070. <https://doi.org/10.1002/jbio.201700070>.
